# Supplementary material
Source: PubMed Central journal article supplement (PMC3546160)
Supplement: NIHMS413888-supplement-01.pdf [file NIHMS413888-supplement-01.pdf]

Table S1. Baseline characteristics of Frequent Hemodialysis Network Trials subjects completing extended cognitive study, by trial

| Baseline characteristic                                               | Daily Trial, N (%)    |                       | Nocturnal Trial, N (%) |                       |
|-----------------------------------------------------------------------|-----------------------|-----------------------|------------------------|-----------------------|
|                                                                       | 3x-per-week<br>(N=31) | 6x-per-week<br>(N=28) | 3x-per-week<br>(N=9)   | 6x-per-week<br>(N=12) |
| Age (years)                                                           | 60.9 ± 13.8           | 49.8 ± 13.0           | 46.0 ± 14.0            | 52.7 ± 15.6           |
| Male                                                                  | 16 (51.6%)            | 18 (64.3%)            | 7 (77.8%)              | 7 (58.3%)             |
| Race /Ethnicity                                                       |                       |                       |                        |                       |
| Black                                                                 | 10 (32.3%)            | 9 (32.1%)             | 1 (11.1%)              | 4 (33.3%)             |
| White                                                                 | 15 (48.4%)            | 12 (42.9%)            | 7 (77.8%)              | 8 (66.7%)             |
| Native American, Aboriginal Canadian,<br>Alaskan Native, First Nation | 0 (0%)                | 1 (3.6%)              | 0 (0%)                 | 0 (0%)                |
| Asian                                                                 | 2 (6.4%)              | 4 (14.3%)             | 1 (11.1%)              | 0 (0%)                |
| Native Hawaiian or other Pacific Islander                             | 1 (3.2%)              | 1 (3.6%)              | 0 (0%)                 | 0 (0%)                |
| Other/Mixed/Unknown                                                   | 3 (9.7%)              | 1 (3.6%)              | 0 (0%)                 | 0 (0%)                |
| Hispanic/Latino Ethnicity                                             | 7 (22.6%)             | 6 (21.4%)             | 0 (0%)                 | 0 (0%)                |
| Primary language English                                              | 28 (90.3%)            | 24 (85.7%)            | 8 (88.9%)              | 12 (100.0%)           |
| Dialysis vintage (years)                                              | 3.2 (0.8, 10.0)       | 3.6 (0.5, 20.9)       | 0.3 (0.01, 28.2)       | 0.6 (0.06, 19.0)      |
| Education                                                             |                       |                       |                        |                       |
| < High school graduate                                                | 3 (9.7%)              | 2 (7.1%)              | 2 (22.2%)              | 2 (16.7%)             |
| High school graduate                                                  | 6 (19.3%)             | 4 (14.3%)             | 3 (33.3%)              | 4 (33.3%)             |
| Post high school                                                      | 22 (71.0%)            | 22 (78.6%)            | 4 (44.4%)              | 6 (50.0%)             |
| Diabetes                                                              | 15 (48.4%)            | 12 (42.9%)            | 3 (33.3%)              | 5 (41.7%)             |
| Stroke                                                                | 4 (12.9%)             | 3 (10.7%)             | 0 (0%)                 | 1 (8.3%)              |
| Charlson comorbidity index                                            | 2.2 ± 2.2             | 1.7 ± 1.5             | 1.9 ± 2.4              | 1.6 ± 1.5             |
| Beck depression index                                                 | 10.1 ± 6.4            | 13.1 ± 8.7            | 10.7 ± 7.2             | 10.3 ± 4.8            |
| Benzodiazepines                                                       | 5 (16.1%)             | 4 (14.3%)             | 1 (11.1%)              | 2 (16.7%)             |
| Antidepressants                                                       | 5 (16.1%)             | 7 (25.0%)             | 3 (33.3%)              | 5 (41.7%)             |
| Anticonvulsants (%)                                                   | 9 (29.0%)             | 7 (25.0%)             | 2 (22.2%)              | 3 (25.0%)             |
| H1-receptor antagonists (%)                                           | 6 (19.4%)             | 4 (14.3%)             | 2 (22.2%)              | 5 (41.7%)             |
| Opioids                                                               | 7 (22.6%)             | 5 (17.9%)             | 0 (0%)                 | 3 (25.0%)             |
| Pre-dialysis SBP (mmHg)                                               | 143 ± 19              | 147 ± 19              | 159 ± 26               | 137 ± 12              |
| Pre-dialysis DBP (mmHg)                                               | 76 ± 12               | 79 ± 11               | 89 ± 14                | 75 ± 12               |

*Kurella Tamura et al, AJKD, "The Effect of More Frequent Hemodialysis on Cognitive Function in the Frequent Hemodialysis Network Trials"*

|                   |            |            |            |            |
|-------------------|------------|------------|------------|------------|
| Hemoglobin (g/dL) | 11.9 ± 1.3 | 12.0 ± 1.2 | 11.9 ± 1.4 | 11.6 ± 1.1 |
| Albumin (g/dL)    | 3.7 ± 0.6  | 3.8 ± 0.4  | 3.8 ± 0.6  | 3.8 ± 0.6  |

Abbreviations: SBP - systolic blood pressure, DBP - diastolic blood pressure
