# Supplementary material
Source: PubMed Central journal article supplement (PMC3546160)
Supplement: NIHMS413888-supplement-02.pdf [file NIHMS413888-supplement-02.pdf]

Table S2. Change in cognitive function scores in the Daily Trial extended cognitive study

| Cognitive test         | Treatment arm | Observed Data<br>(Mean ± standard deviation) |             |             | Adjusted Means and Treatment Effect *<br>(± SE or with 95% Confidence Intervals) |                                  |                      |                                  |
|------------------------|---------------|----------------------------------------------|-------------|-------------|----------------------------------------------------------------------------------|----------------------------------|----------------------|----------------------------------|
|                        |               | Baseline                                     | 4 Months    | 12 months   | Month 4                                                                          |                                  | Month 12             |                                  |
|                        |               |                                              |             |             | Change from Baseline                                                             | Treatment Comparison (6x vs. 3x) | Change from Baseline | Treatment Comparison (6x vs. 3x) |
| Trails B t-score       | 3x-per-wk     | 37.1 ± 15.6                                  | 38.6 ± 14.0 | 45.9 ± 14.5 | 1.4 ± 2.5                                                                        | 2.2<br>(-4.6, 9.0)               | 8.6 ± 2.9            | 0.7<br>(-7.2, 8.6)               |
|                        | 6x-per-wk     | 42.7 ± 15.3                                  | 45.1 ± 17.8 | 51.1 ± 18.8 | 3.6 ± 2.4                                                                        |                                  | 9.3 ± 2.8            |                                  |
| 3MS                    | 3x-per-wk     | 90.3 ± 7.4                                   | 90.3 ± 7.4  | 90.2 ± 8.5  | -1.3 ± 1.4                                                                       | 3.4<br>(-0.6, 7.3)               | -1.8 ± 1.5           | 3.8<br>(-0.4, 8.1)               |
|                        | 6x-per-wk     | 89.6 ± 7.9                                   | 93.4 ± 4.5  | 93.3 ± 7.0  | 2.1 ± 1.4                                                                        |                                  | 2.1 ± 1.5            |                                  |
| Digit Symbol           | 3x-per-wk     | 42.7 ± 16.5                                  | 43.6 ± 14.4 | 51.1 ± 18.3 | -1.4 ± 2.2                                                                       | 0.1<br>(-5.5, 5.8)               | 6.8 ± 2.3            | -0.4<br>(-6.7, 6.0)              |
|                        | 6x-per-wk     | 53.4 ± 19.0                                  | 52.6 ± 16.9 | 63.8 ± 19.2 | -1.2 ± 2.1                                                                       |                                  | 6.5 ± 2.2            |                                  |
| Trails A               | 3x-per-wk     | 62.1 ± 33.8                                  | 55.5 ± 34.1 | 49.1 ± 31.7 | -1.6 ± 4.3                                                                       | -2.1<br>(-13.7, 9.5)             | -3.3 ± 6.3           | -4.2<br>(-21.1, 12.6)            |
|                        | 6x-per-wk     | 40.9 ± 19.3                                  | 36.8 ± 16.3 | 36.2 ± 20.6 | -3.7 ± 4.2                                                                       |                                  | -7.6 ± 6.3           |                                  |
| Pegboard Dominant hand | 3x-per-wk     | 127 ± 55                                     | 118 ± 52    | 121 ± 44    | -1.1 ± 5.6                                                                       | 3.4<br>(-11.8, 18.5)             | 3.0 ± 10.0           | 7.4<br>(-20.5, 35.3)             |
|                        | 6x-per-wk     | 118 ± 65                                     | 107 ± 53    | 117 ± 71    | 2.3 ± 5.4                                                                        |                                  | 10.5 ± 9.7           |                                  |
| Pegboard Non-dom hand  | 3x-per-wk     | 141 ± 60                                     | 141 ± 61    | 133 ± 45    | 12.3 ± 7.7                                                                       | -16.9<br>(-37.6, 3.8)            | 3.3 ± 9.9            | -5.4<br>(-32.6, 21.8)            |
|                        | 6x-per-wk     | 132 ± 66                                     | 124 ± 55    | 127 ± 69    | -4.6 ± 7.4                                                                       |                                  | -2.1 ± 9.7           |                                  |
| RAVLT immediate recall | 3x-per-wk     | 39.3 ± 12.6                                  | 37.5 ± 11.6 | 38.5 ± 10.4 | -3.2 ± 1.5                                                                       | 2.6<br>(-1.3, 6.5)               | -1.0 ± 1.4           | 5.9**<br>(1.3, 10.6)             |
|                        | 6x-per-wk     | 41.7 ± 12.8                                  | 42.0 ± 13.3 | 48.8 ± 10.1 | -0.6 ± 1.4                                                                       |                                  | 1.9 ± 1.4            |                                  |
| RAVLT delayed recall   | 3x-per-wk     | 7.7 ± 4.5                                    | 7.4 ± 3.9   | 7.9 ± 3.7   | -0.9 ± 0.5                                                                       | 0.8<br>(-0.4, 2.0)               | -0.4 ± 0.5           | 0.8<br>(-0.6, 2.2)               |
|                        | 6x-per-wk     | 8.1 ± 4.2                                    | 8.5 ± 4.0   | 10.1 ± 2.3  | -0.1 ± 0.4                                                                       |                                  | -0.1 ± 0.5           |                                  |

|                          |           |             |             |             |            |                     |            |                     |
|--------------------------|-----------|-------------|-------------|-------------|------------|---------------------|------------|---------------------|
| Letter number sequencing | 3x-per-wk | 8.1 ± 3.2   | 8.0 ± 3.5   | 8.8 ± 4.0   | -0.7 ± 0.4 | 1.6**<br>(0.4, 2.8) | 0.3 ± 0.4  | 1.0<br>(-0.7, 2.7)  |
|                          | 6x-per-wk | 9.1 ± 2.7   | 10.2 ± 3.1  | 10.5 ± 3.5  | 1.0 ± 0.4  |                     | 0.8 ± 0.4  |                     |
| COWAT                    | 3x-per-wk | 30.6 ± 13.4 | 30.0 ± 13.2 | 33.2 ± 15.0 | -1.0 ± 1.0 | 2.1<br>(-0.6, 4.9)  | -3.6 ± 1.4 | 4.8**<br>(0.3, 9.3) |
|                          | 6x-per-wk | 30.5 ± 9.6  | 32.3 ± 10.4 | 35.6 ± 9.8  | 1.2 ± 1.0  |                     | 0.4 ± 1.3  |                     |

\*Values adjusted for baseline score

\*\* P-value <0.05

Note: positive numbers indicate more favorable changes for 6x-per-week versus 3x-per-week group for the Digit Symbol, RAVLT, Letter number sequencing, and COWAT. For all other tests, negative numbers indicate more favorable changes for 6x-per-week versus 3x-per-week group.

Abbreviations: SD - standard deviation, SE - standard error, CI - confidence interval, RAVLT - Rey Auditory Verbal Learning Test, COWAT - controlled oral word association test
