# Supplementary material
Source: PubMed Central journal article supplement (PMC3546160)
Supplement: NIHMS413888-supplement-03.pdf [file NIHMS413888-supplement-03.pdf]

Table S3. Change in cognitive function scores in the Nocturnal Trial extended cognitive study

| Cognitive test           | Treatment arm | Observed Data (Mean ± SD) |             |             | Adjusted Means and Treatment Effect *<br>(± SE or with 95% Confidence Intervals) |                                  |                      |                                  |
|--------------------------|---------------|---------------------------|-------------|-------------|----------------------------------------------------------------------------------|----------------------------------|----------------------|----------------------------------|
|                          |               | Baseline                  | 4 Months    | 12 months   | Month 4                                                                          |                                  | Month 12             |                                  |
|                          |               |                           |             |             | Change from Baseline                                                             | Treatment Comparison (6x vs. 3x) | Change from Baseline | Treatment Comparison (6x vs. 3x) |
| Trails B t-score         | 3x-per-wk     | 43.0 ± 16.0               | 43.5 ± 24.2 | 57.3 ± 5.8  | 2.0 ± 8.8                                                                        | -1.4<br>(-24.0, 21.1)            | 15.1 ± 5.9           | -17.7*<br>(-33.2, -2.2)          |
|                          | 6x-per-wk     | 42.7 ± 15.6               | 36.7 ± 20.7 | 36.8 ± 22.8 | 0.6 ± 8.3                                                                        |                                  | -2.6 ± 5.4           |                                  |
| 3MS                      | 3x-per-wk     | 91.5 ± 4.9                | 92.4 ± 6.3  | 94.6 ± 3.9  | 1.6 ± 1.6                                                                        | 0.2<br>(-4.3, 4.7)               | 3.8 ± 1.4            | 0.2<br>(-3.1, 3.4)               |
|                          | 6x-per-wk     | 92.6 ± 4.3                | 93.9 ± 4.9  | 95.6 ± 3.4  | 1.8 ± 1.5                                                                        |                                  | 3.9 ± 1.4            |                                  |
| Symbol Digit             | 3x-per-wk     | 40.4 ± 6.1                | 46.3 ± 7.7  | 51.3 ± 10.3 | 5.9 ± 2.2                                                                        | -1.5<br>(-7.5, 4.5)              | 9.8 ± 2.7            | -8.3*<br>(-16.1, -0.6)           |
|                          | 6x-per-wk     | 40.3 ± 11.3               | 42.7 ± 14.4 | 38.4 ± 14.8 | 4.4 ± 2.1                                                                        |                                  | 1.4 ± 2.6            |                                  |
| Trails A                 | 3x-per-wk     | 38.4 ± 10.4               | 38.6 ± 6.4  | 31.0 ± 9.0  | -1.0 ± 3.4                                                                       | 0.4<br>(-8.5, 9.2)               | -6.8 ± 5.2           | 3.0<br>(-12.1, 18.2)             |
|                          | 6x-per-wk     | 44.6 ± 19.2               | 45.0 ± 19.3 | 47.0 ± 24.5 | -0.7 ± 3.3                                                                       |                                  | -3.8 ± 5.2           |                                  |
| RAVLT immed recall       | 3x-per-wk     | 38.1 ± 10.1               | 39.3 ± 12.3 | 43.5 ± 10.8 | 0.4 ± 2.3                                                                        | -3.2<br>(-9.4, 2.9)              | 2.7 ± 3.3            | -1.3<br>(-10.7, 8.2)             |
|                          | 6x-per-wk     | 42.1 ± 10.1               | 38.1 ± 11.5 | 40.9 ± 13.9 | -2.9 ± 2.1                                                                       |                                  | 1.4 ± 3.1            |                                  |
| RAVLT delayed recall     | 3x-per-wk     | 6.3 ± 3.6                 | 8.1 ± 2.8   | 7.4 ± 3.1   | 1.4 ± 0.9                                                                        | -1.9<br>(-4.1, 0.3)              | 0.2 ± 1.3            | -0.6<br>(-3.9, 2.8)              |
|                          | 6x-per-wk     | 7.4 ± 4.1                 | 6.4 ± 3.5   | 6.1 ± 4.2   | -0.6 ± 0.9                                                                       |                                  | -0.4 ± 1.2           |                                  |
| Letter number sequencing | 3x-per-wk     | 8.7 ± 1.58                | 10.9 ± 2.9  | 9.6 ± 1.9   | 2.2 ± 0.7                                                                        | -0.7<br>(-2.5, 1.0)              | 0.9 ± 0.5            | -0.3<br>(-1.8, 1.2)              |
|                          | 6x-per-wk     | 8.9 ± 2.87                | 9.7 ± 2.9   | 8.6 ± 2.5   | 1.5 ± 0.6                                                                        |                                  | 0.5 ± 0.5            |                                  |
| COWAT                    | 3x-per-wk     | 34.2 ± 15.6               | 27.4 ± 17.5 | 26.9 ± 13.6 | -5.5 ± 3.1                                                                       | -2.8<br>(-11.0, 5.3)             | -6.4 ± 2.1           | -1.8<br>(-7.0, 3.3)              |

|  |           |                |               |               |               |  |               |  |
|--|-----------|----------------|---------------|---------------|---------------|--|---------------|--|
|  | 6x-per-wk | 26.1 ±<br>11.9 | 18.6 ±<br>8.9 | 18.3 ±<br>8.1 | -8.3 ±<br>3.0 |  | -8.2 ±<br>2.0 |  |
|--|-----------|----------------|---------------|---------------|---------------|--|---------------|--|

\*Values adjusted for baseline score

\*\* P-value <0.05

Note: positive numbers indicate more favorable changes for 6x-per-week versus 3x-per-week group for the Digit Symbol, RAVLT, Letter number sequencing, and COWAT. For all other tests, negative numbers indicate more favorable changes for 6x-per-week versus 3x-per-week group.

Abbreviations: SD - standard deviation, SE - standard error, CI - confidence interval, RAVLT - Rey Auditory Verbal Learning Test, COWAT - controlled oral word association test
