# Supplementary material
Source: PubMed Central journal article supplement (PMC3546160)
Supplement: NIHMS413888-supplement-04.pdf [file NIHMS413888-supplement-04.pdf]

**Figure S1:** Flow of Participants in the FHN Daily Trial

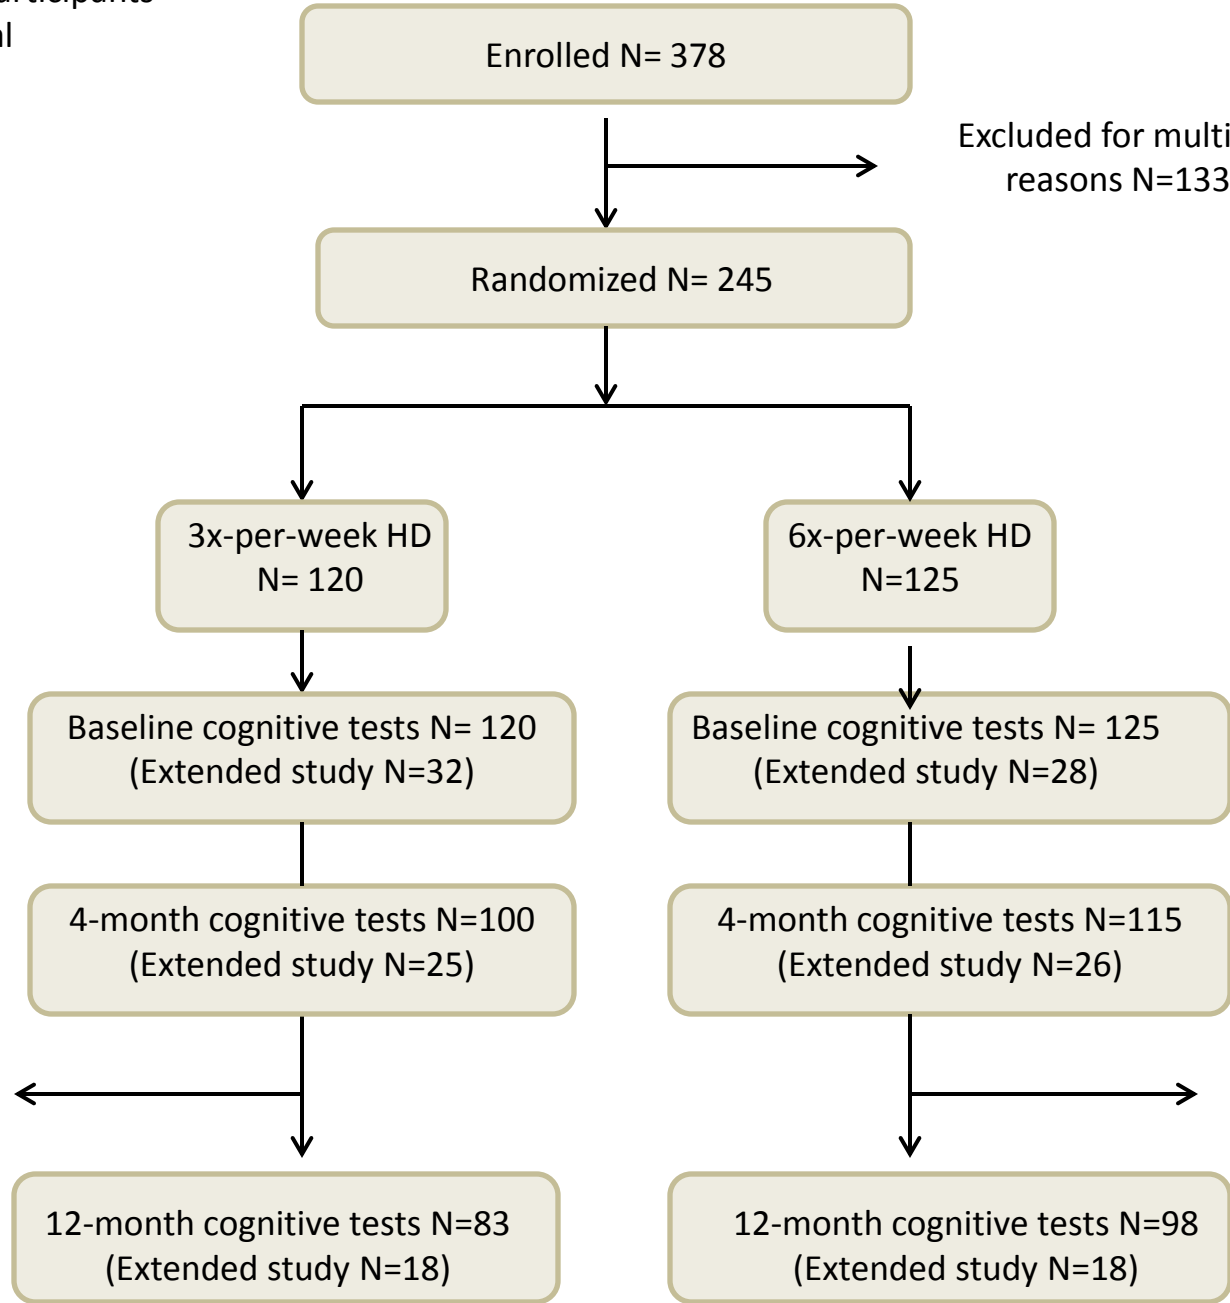

No 12-month testing  
Death N=9  
Transplant N=13  
Other reasons N=17

No 12-month testing  
Death N=5  
Transplant N=11  
Other reasons N=13
