# Supplementary material
Source: PubMed Central journal article supplement (PMC3546160)

**Figure S2:** Flow of Participants in the FHN Nocturnal Trial

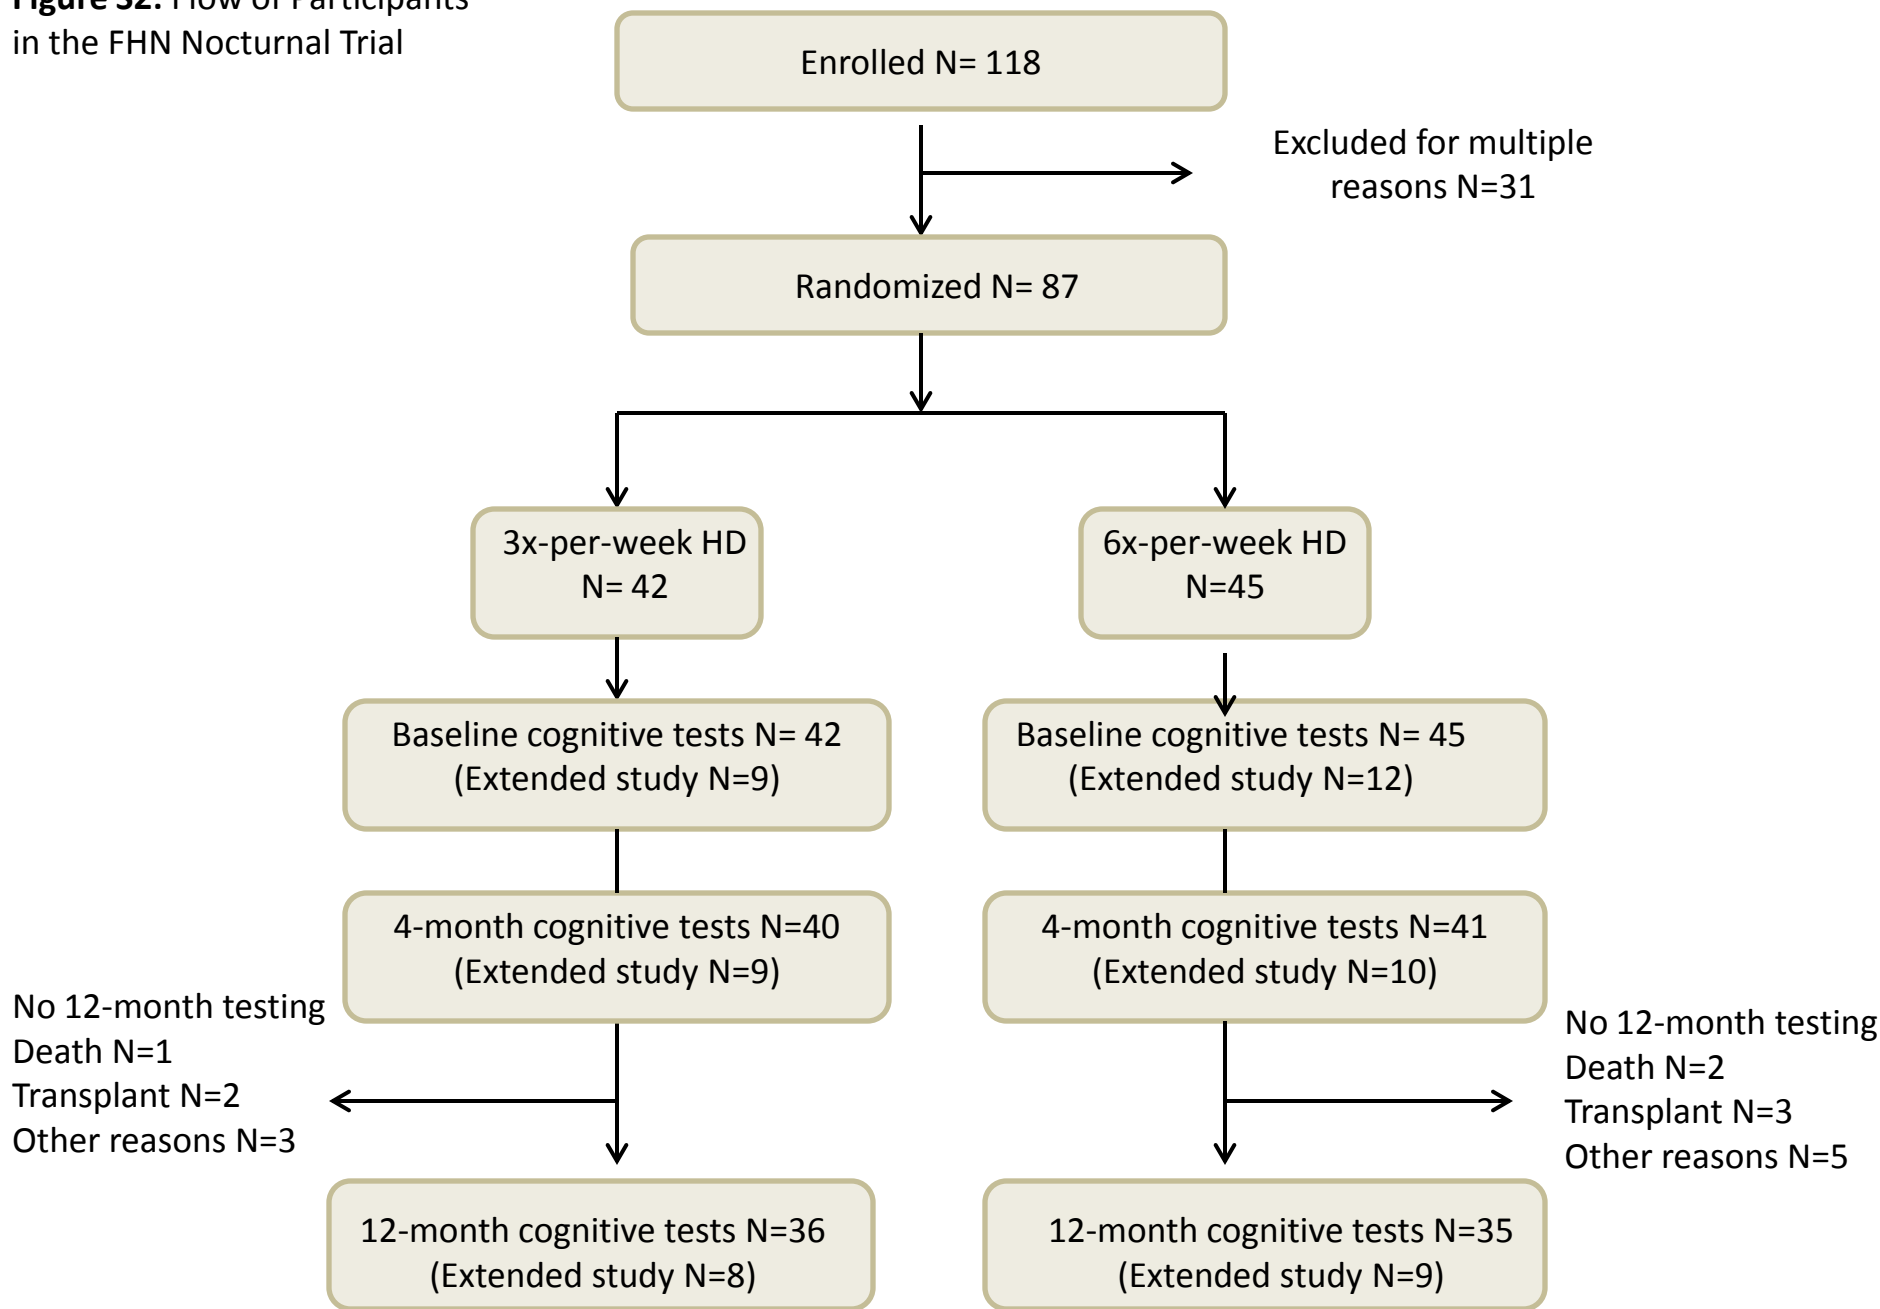

Supplement: NIHMS413888-supplement-05.pdf [file NIHMS413888-supplement-05.pdf]
